# Supplementary material for: Multifunctional Biotemplated Micromotors for In Situ Decontamination of Antibiotics and Heavy Metals in Soil and Groundwater
Source: MDPI journal article supplement (doi:10.3390/nano13192710), 2023-10-06
Supplement: s1 [file s1]

## Supporting Information

### Multifunctional Biotemplated Micromotors for in-situ Decontamination of Antibiotics and Heavy Metals in Soil and Groundwater

Haohao Cui, Ke Wang, Enhui Ma and Hong Wang\*

**Figure S1.** Time-lapse image of the motion of a magnetic micromotor in 1 wt% H<sub>2</sub>O<sub>2</sub> and 0.2 wt% Tween 20.

**Figure S2.** The degradation efficiency of Rhodamine B at magnetic micromotors + H<sub>2</sub>O<sub>2</sub> + PMS system.

**Figure S3.** The degradation efficiency of salicylhydroxamic acid at magnetic micromotors + H<sub>2</sub>O<sub>2</sub> + PMS system.

**Figure S4.** The SEM images of magnetic micromotors after adsorption of Pb<sup>2+</sup> and corresponding EDX elemental mapping.

**Figure S5.** The SEM image of magnetic micromotors after degradation of TC and adsorption of Pb<sup>2+</sup>.

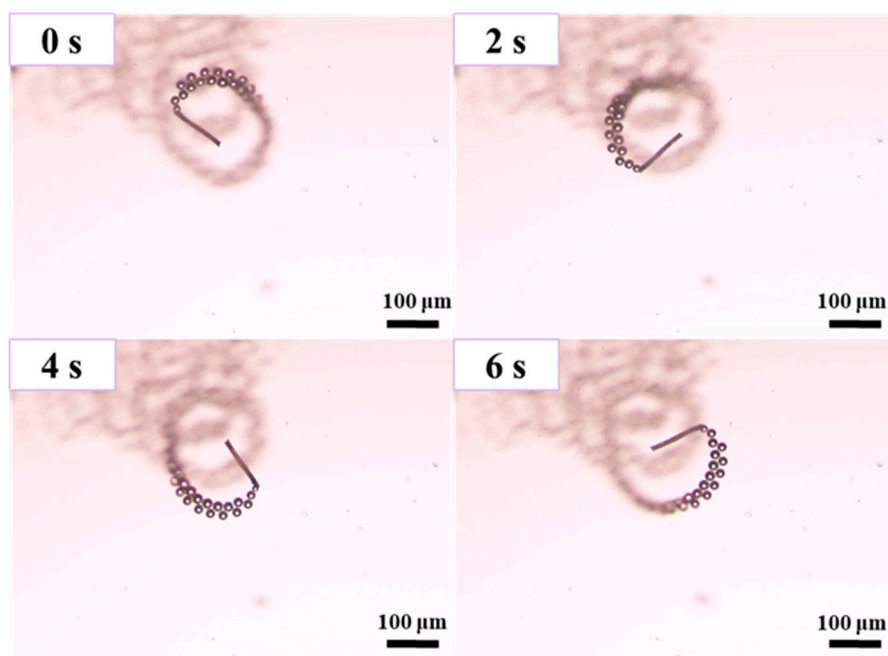

**Figure S1.** Time-lapse image of the motion of a magnetic micromotor in 1 wt% H<sub>2</sub>O<sub>2</sub> and 0.2 wt% Tween 20.

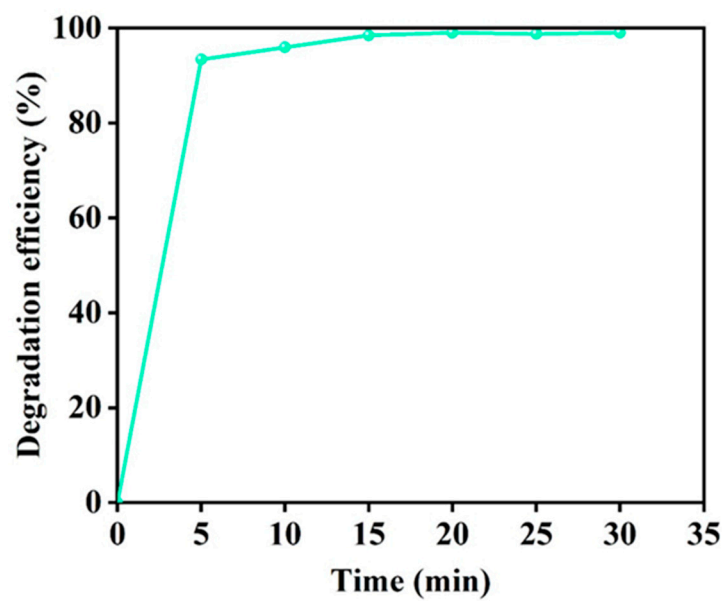

**Figure S2.** The degradation efficiency of Rhodamine B at magnetic micromotors + H<sub>2</sub>O<sub>2</sub> + PMS system.

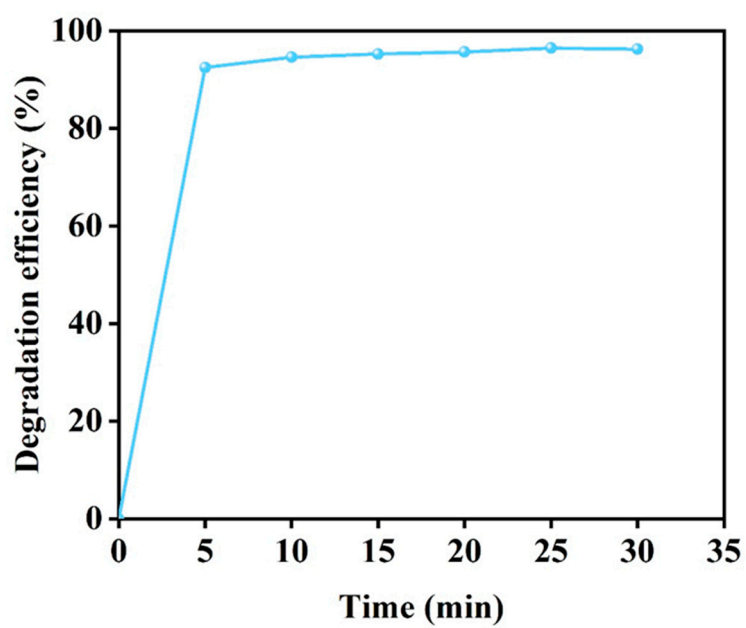

**Figure S3.** The degradation efficiency of salicylhydroxamic acid at magnetic micromotors + H<sub>2</sub>O<sub>2</sub> + PMS system.

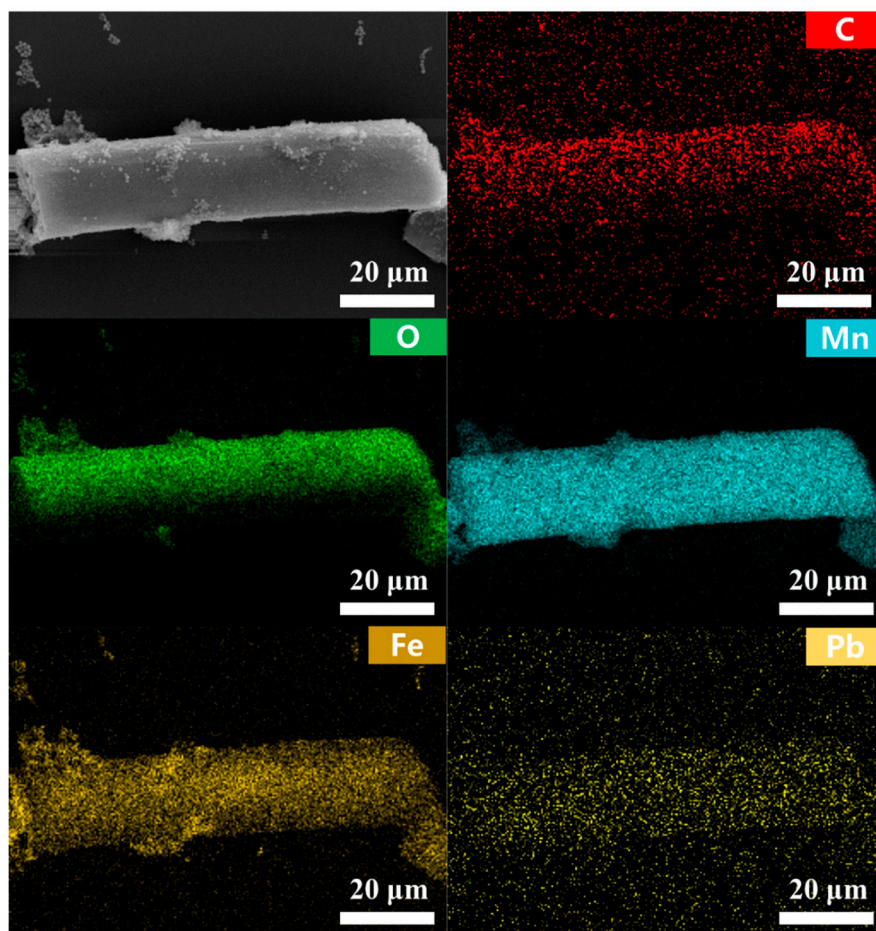

**Figure S4.** The SEM image of magnetic micromotors after adsorption of  $\text{Pb}^{2+}$  and corresponding EDX elemental mapping.

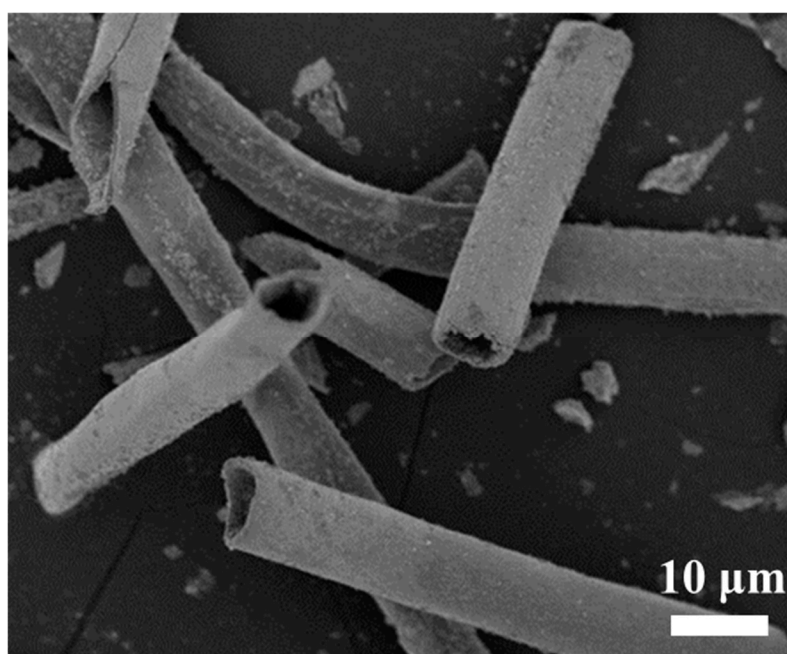

**Figure S5.** The SEM image of magnetic micromotors after degradation of TC and adsorption of  $\text{Pb}^{2+}$
